# Supplementary material for: EGR1 drives cell proliferation by directly stimulating TFEB transcription in response to starvation
Source: PLoS Biol. 2023 Mar 8;21(3):e3002034. doi: 10.1371/journal.pbio.3002034 (PMC9994711; doi:10.1371/journal.pbio.3002034)
Supplement: S1 Data — Each tab contains the panels relative to the indicated figure for which a quantitative analysis was required. (XLSX) [file pbio.3002034.s006.xlsx]

## Sheet: Overview
FIGURE	PANEL	TITLE
1	B	Survey of selected TFs
1	C	TFEB promoter activity assay
1	D	TFEB expression values from RNAseq
1	F	EGR1 and TFEB expression levels in a starvation time course
2	A	EGR1, TFEB, TFE3 and MITF expression levels upon siEGR1
2	D	Enrichment analysis
2	E	RNAseq based expression of representative genes upon siEGR1
3	B	CFU quantification in HeLa WT and FLCN KO cells
3	C	qPCR of TFEB and EGR1 in HeLa-FLCN KO upon shLUC and shEGR1
3	E	High-Content Imaging-based quantifiction of 3D spheroids of HeLa-FLCN KO cells
3	G	High-Content Imaging-based quantifiction of 3D spheroids of HeLa-FLCN KO cells following TFEB overexpression
4	B	TFEB promoter activity assay upon Trametinib treatment
4	C	Trametinib dose-response curve
4	D	qPCR of TFEB and EGR1 levels in cell treated with Trametinib
4	G	CFU quantification in UOK-247cells
4	K	High-Content Imaging-based quantifiction of the ratio of intensity/area of 3D spheroids from UOK-257
S1	A	(left) TFEB expression across tissues (Human Protein Atlas)
S1	A	(right) TFEB expression across cell lines (UCSC Transcription data)
S2	A	Enrichment analysis relative to EGR1 overexpression in HeLa
S2	B	RNAseq based expression of selected genes upon EGR1 overexpression in HeLa
S3	B	Enrichment analysis relative to EGR1 targets upregulated in starvation
S4	B	High-Content Imaging-based quantifiction relative to the wound healing assay
S5	A	qPCR of TFEB and EGR1 in HeLa upon Trametinib treatment
S5	D	Enrichment analysis relative to genes downregulated following Trametinib treatment in HeLa-FLCN KO cells

## Sheet: Fig. 1
Fig. 1B						Fig. 1C							Fig. 1D			Fig.1F
	REP 1	REP 2	MEAN	SD		region	type	factor	ratio					CPM		Gene Symbol	Comparison	Log Fold Change	FDR
EGR1	20.859	27.8412	24.3501	3.49111		Promoter	WT	EMPTY	0.87799	0.800063	0.180929		CTRL	14.21		EGR1	2hvs0h	2.67264	3.52367e-09
KLF4	9.55755	17.6115	13.5845	4.02696		Promoter	WT	EMPTY	1.00881				CTRL	6.75		EGR1	4hvs0h	1.98179	0.000104138
JUNB	8.36253	9.80269	9.08261	0.720083		Promoter	WT	EMPTY	0.691343				CTRL	11.21		EGR1	6hvs0h	2.12137	3.84374e-06
USF1	6.11775	11.3459	8.73181	2.61406		Promoter	WT	EMPTY	0.675556				CTRL	7.86		EGR1	8hvs0h	0.916459	0.145285
SP3	8.65803	6.29291	7.47547	1.18256		Promoter	WT	EMPTY	0.988539				EGR1	22.68		TFEB	2hvs0h	0.233203	0.781672
SP4	9.31373	5.4656	7.38967	1.92406		Promoter	WT	EMPTY	0.972694				EGR1	29		TFEB	4hvs0h	0.17618	0.751372
JUN	5.01122	7.99898	6.5051	1.49388		Promoter	WT	EMPTY	0.571287				EGR1	15.81		TFEB	6hvs0h	0.836121	0.00396176
GATA3	6.74644	5.96423	6.35534	0.391105		Promoter	WT	EMPTY	0.614286				EGR1	31.78		TFEB	8hvs0h	1.04375	0.000126189
HCFC1	4.50031	6.54997	5.52514	1.02483		Promoter	WT	EGR1	19.8598	17.4984	3.49841
MXI1	5.96982	4.86899	5.4194	0.550415		Promoter	WT	EGR1	13.8194
NRF1	1.51211	8.89427	5.20319	3.69108		Promoter	WT	EGR1	15.2642
RFX2	5.70733	4.43317	5.07025	0.637079		Promoter	WT	EGR1	21.05
POU2F2	6.04486	3.94552	4.99519	1.04967		Promoter	Mut	EMPTY	1.0452	0.830049	0.153976
FOS	4.23026	5.19058	4.71042	0.480161		Promoter	Mut	EMPTY	0.838923
ZEB1	2.03816	6.83212	4.43514	2.39698		Promoter	Mut	EMPTY	0.661458
FOXM1	6.17539	2.53622	4.3558	1.81959		Promoter	Mut	EMPTY	0.708571
NR2C2	6.26919	2.4283	4.34874	1.92044		Promoter	Mut	EMPTY	1.04864
REL	3.36887	4.84202	4.10545	0.736573		Promoter	Mut	EMPTY	0.866634
KLF15	1.66623	6.21797	3.9421	2.27587		Promoter	Mut	EMPTY	0.666906
SNAI2	2.72324	4.35815	3.54069	0.817454		Promoter	Mut	EMPTY	0.804054
STAT4	2.94502	4.03537	3.4902	0.545178		Promoter	Mut	EGR1	5.75904	6.17291	0.609327
SP2	3.54175	3.32304	3.43239	0.109352		Promoter	Mut	EGR1	5.63415
PKNOX1	3.98213	2.69845	3.34029	0.641838		Promoter	Mut	EGR1	6.33416
FOSL2	3.05436	2.75776	2.90606	0.148302		Promoter	Mut	EGR1	6.96429
SMAD2	2.43784	3.3227	2.88027	0.44243
TCF12	3.51643	2.00385	2.76014	0.756289
HEY2	2.19737	3.28291	2.74014	0.542768
RAD21	3.03506	2.38818	2.71162	0.323442
STAT1	3.02254	2.38757	2.70506	0.317486
RFX5	3.84351	1.55652	2.70001	1.14349
MEIS2	3.12194	2.24384	2.68289	0.439054
NFYB	2.91426	2.07232	2.49329	0.420971
MAX	2.49351	2.31763	2.40557	0.0879394
ZKSCAN1	1.76413	2.99907	2.3816	0.617467
FOSL1	1.88564	2.82872	2.35718	0.47154
TEAD4	2.24376	2.46856	2.35616	0.112403
ATF2	1.79951	2.90733	2.35342	0.55391
NR5A2	1.96935	2.73628	2.35282	0.383469
BCL6	2.0748	2.43469	2.25475	0.179946
HAND1	1.97357	2.3955	2.18453	0.210967
FLI1	2.50196	1.85922	2.18059	0.321369
RXRB	1.97466	2.35736	2.16601	0.191351
E2F6	2.33653	1.99314	2.16484	0.171696
SMAD3	2.06101	2.19462	2.12782	0.0668032
RELA	2.04659	2.17161	2.1091	0.0625108
TFCP2	1.66566	2.53042	2.09804	0.432378
CHD2	2.66001	1.48323	2.07162	0.588389
SIN3A	2.11745	1.9984	2.05792	0.0595246
ELK1	3.21352	0.85946	2.03649	1.17703
IRF5	1.78693	2.26489	2.02591	0.23898
ETS2	1.59041	2.42779	2.0091	0.41869
ELF3	2.63135	1.38135	2.00635	0.625001
CHD1	0.994048	2.93916	1.9666	0.972555
STAT3	2.0807	1.82132	1.95101	0.129695
ZNF384	0.76589	3.08394	1.92492	1.15903
PBX3	3.14867	0.598163	1.87342	1.27525
THAP1	2.2844	1.42136	1.85288	0.431521
BACH1	2.2107	1.3968	1.80375	0.406952
NFATC1	1.81831	1.77129	1.7948	0.0235079
BRCA1	1.71518	1.79475	1.75497	0.0397872
USF2	1.98313	1.5086	1.74586	0.237268
TFDP1	2.15818	1.16824	1.66321	0.494971
EGR4	1.6868	1.62931	1.65805	0.0287466
NFIC	0.953836	2.11903	1.53643	0.582597
ETS1	2.13267	0.8525	1.49258	0.640083
YY1	0.721492	2.25213	1.48681	0.765318
NFIA	1.89016	1.07884	1.4845	0.405662
EHF	0.977025	1.74223	1.35963	0.382601
PML	1.52313	1.14844	1.33579	0.18735
NFATC2	1.03194	1.36356	1.19775	0.165813
EBF1	0.7338	1.56432	1.14906	0.41526
MTA3	1.13134	1.15864	1.14499	0.0136512
OLIG3	0.542491	1.68753	1.11501	0.572522
TGIF2	1.42656	0.68915	1.05786	0.368708
EMPTY	0.83797	1.16203	1	0.16203
SPIB	0.791043	1.12481	0.957928	0.166885
NFE2	0.76911	0.925183	0.847147	0.0780365
CEBPB	0.15629	0.15769	0.15699	0.000699983

## Sheet: Fig. 2
Fig. 2A						Fig. 2D
Gene	Time-Point	SCR	siEGR1		Pathway	P.value	Overlap	P.adj	Database
EGR1	FED	1	0.408951		G2-M Checkpoint	2.70799e-15	25.5	1.354e-13	KEGG
EGR1	FED	1.13027	0.434271		Mitotic Spindle	1.72636e-13	24.1206	4.31591e-12	KEGG
EGR1	FED	1	0.668964		TNF-alpha Signaling via NF-kB	1.28483e-11	22.5	2.14138e-10	KEGG
EGR1	FED	1	0.710382		mTORC1 Signaling	4.77497e-11	22	5.96871e-10	KEGG
EGR1	6h	8.30128	1.73307		UV Response Dn	1.05541e-09	23.6111	1.05541e-08	KEGG
EGR1	6h	7.6564	1.75727		Hypoxia	6.73029e-08	19	5.60858e-07	KEGG
EGR1	6h	8.63383	2.36745		Unfolded Protein Response	6.24354e-07	22.1239	4.45967e-06	KEGG
EGR1	6h	7.37853	1.62451		Androgen Response	8.4345e-07	23	5.27156e-06	KEGG
EGR1	8h	4.45883	2.45094		Lyso	0.0217001	7.5	0.0434002	Custom_genesets
EGR1	8h	4.68051	2.78949		Auto	0.483292	10.5485	0.483292	Custom_genesets
EGR1	8h	8.13044	4.3269
EGR1	8h	6.77396	3.37137		Fig.2E
EGR1	12h	1.32869	0.882703		Gene Symbol	Condition	Value
EGR1	12h	0.97942	0.608502		GSK3B	siEGR1	50.7228
EGR1	12h	2.53151	1.66248		GSK3B	siEGR1	40.8991
EGR1	12h	2.35653	1.50873		GSK3B	siEGR1	31.1017
TFEB	FED	1	1.19196		GSK3B	siEGR1	40.2464
TFEB	FED	1.15936	1.26576		GSK3B	SCR	53.7976
TFEB	FED	1	1.02337		GSK3B	SCR	76.2497
TFEB	FED	1	1.06683		GSK3B	SCR	57.05
TFEB	6h	1.49831	1.13288		GSK3B	SCR	54.6464
TFEB	6h	1.26283	0.918064		TGFB2	siEGR1	39.8746
TFEB	6h	1.71713	1.18099		TGFB2	siEGR1	38.3951
TFEB	6h	1.3566	1.19196		TGFB2	siEGR1	36.5902
TFEB	8h	2.65124	1.46747		TGFB2	siEGR1	31.578
TFEB	8h	2.46229	2.01391		TGFB2	SCR	46.3329
TFEB	8h	2.92817	1.61702		TGFB2	SCR	57.6915
TFEB	8h	2.76383	1.55833		TGFB2	SCR	65.029
TFEB	12h	2.88786	1.5874		TGFB2	SCR	75.9182
TFEB	12h	2.72578	1.68179		GADD45B	siEGR1	28.1468
TFEB	12h	2.14851	1.29834		GADD45B	siEGR1	26.7096
TFEB	12h	2.12874	1.19748		GADD45B	siEGR1	28.8148
TFE3	FED	1	1.53687		GADD45B	siEGR1	23.5287
TFE3	FED	1	0.922316		GADD45B	SCR	38.3533
TFE3	FED	1	0.954842		GADD45B	SCR	61.3225
TFE3	FED	1	1.17013		GADD45B	SCR	34.3098
TFE3	6h	0.907519	0.695762		GADD45B	SCR	52.4459
TFE3	6h	0.866537	0.68302		CDK6	siEGR1	108.482
TFE3	6h	0.764895	0.456916		CDK6	siEGR1	143.564
TFE3	8h	2.02324	2.22427		CDK6	siEGR1	102.91
TFE3	8h	1.68179	1.8489		CDK6	siEGR1	79.8736
TFE3	8h	2.59668	2.00926		CDK6	SCR	237.07
TFE3	8h	2.30804	1.47427		CDK6	SCR	256.99
TFE3	12h	1.63203	1.41749		CDK6	SCR	229.796
TFE3	12h	0.797377	0.653685		CDK6	SCR	247.926
TFE3	12h	1.78592	0.997692		CCND1	siEGR1	54.2412
TFE3	12h	1.5874	1.23114		CCND1	siEGR1	60.9314
MITF	FED	1	1.30435		CCND1	siEGR1	69.5214
MITF	FED	1	1.16743		CCND1	siEGR1	47.6765
MITF	FED	1	1.17013		CCND1	SCR	122.01
MITF	FED	1	1.41749		CCND1	SCR	159.358
MITF	6h	1.15669	0.946058		CCND1	SCR	105.722
MITF	6h	1.3692	1.217		CCND1	SCR	122.496
MITF	6h	1.43396	1.15402		TTK	siEGR1	42.5134
MITF	6h	1.53687	1.06683		TTK	siEGR1	49.6632
MITF	8h	1.95884	1.91853		TTK	siEGR1	37.505
MITF	8h	2.12383	2.46229		TTK	siEGR1	42.7231
MITF	8h	2.37292	2.06098		TTK	SCR	63.3216
MITF	8h	2.38943	2.23974		TTK	SCR	58.095
MITF	12h	1.3566	1.43396		TTK	SCR	84.5777
MITF	12h	1.47768	1.46409		TTK	SCR	55.3799
MITF	12h	1.67018	1.55114		LMNB1	siEGR1	85.3199
MITF	12h	1.73307	1.81085		LMNB1	siEGR1	60.514
					LMNB1	siEGR1	55.8001
					LMNB1	siEGR1	41.4848
					LMNB1	SCR	84.4288
					LMNB1	SCR	105.701
					LMNB1	SCR	104.126
					LMNB1	SCR	85.8205
					GADD45A	siEGR1	43.0998
					GADD45A	siEGR1	58.8447
					GADD45A	siEGR1	68.6067
					GADD45A	siEGR1	70.586
					GADD45A	SCR	128.188
					GADD45A	SCR	129.1
					GADD45A	SCR	126.069
					GADD45A	SCR	118.462
					RB1	siEGR1	60.1051
					RB1	siEGR1	35.4737
					RB1	siEGR1	33.3886
					RB1	siEGR1	51.3916
					RB1	SCR	79.2807
					RB1	SCR	70.6015
					RB1	SCR	64.2311
					RB1	SCR	49.1451
					CCNA2	siEGR1	81.5084
					CCNA2	siEGR1	67.6088
					CCNA2	siEGR1	64.0329
					CCNA2	siEGR1	99.6873
					CCNA2	SCR	163.452
					CCNA2	SCR	130.714
					CCNA2	SCR	195.087
					CCNA2	SCR	158.071
					BUB1B	siEGR1	59.8119
					BUB1B	siEGR1	85.137
					BUB1B	siEGR1	53.9706
					BUB1B	siEGR1	57.5833
					BUB1B	SCR	114.288
					BUB1B	SCR	99.649
					BUB1B	SCR	88.9661
					BUB1B	SCR	89.1213
					PLK1	siEGR1	258.305
					PLK1	siEGR1	248.316
					PLK1	siEGR1	244.24
					PLK1	siEGR1	198.136
					PLK1	SCR	333.854
					PLK1	SCR	366.724
					PLK1	SCR	318.363
					PLK1	SCR	309.908

## Sheet: Fig. 3
Fig. 3B					Fig. 3E					Fig. 3G
Treatment	Condition	Number of colonies	Area (%)		Days	Treatment	Area (um^2)			Days	Treatment	Dox	Area (um^2)
shLUC	KO	396	24.929		d2	shLUC	109773			d2	shLUC	noDOX	97433
shLUC	KO	420	35.971		d3	shLUC	128215			d4	shLUC	noDOX	160899
shLUC	KO	337	19.919		d4	shLUC	152906			d6	shLUC	noDOX	205575
shLUC	KO	382	23.333		d5	shLUC	188970			d8	shLUC	noDOX	236488
shLUC	KO	420	28.273		d6	shLUC	222035			d2	shLUC	noDOX	90739
shLUC	KO	379	21.016		d7	shLUC	263819			d4	shLUC	noDOX	146057
shEGR1	KO	0	0		d8	shLUC	287591			d6	shLUC	noDOX	209600
shEGR1	KO	0	0		d9	shLUC	330582			d8	shLUC	noDOX	284377
shEGR1	KO	0	0		d2	shLUC	125459			d2	shLUC	noDOX	90292
shEGR1	KO	0	0		d3	shLUC	157678			d4	shLUC	noDOX	156288
shEGR1	KO	0	0		d4	shLUC	197556			d6	shLUC	noDOX	228078
shEGR1	KO	0	0		d5	shLUC	243394			d8	shLUC	noDOX	307606
shLUC	WT	83	3.966		d6	shLUC	291768			d2	shLUC	noDOX	93297
shLUC	WT	156	7.656		d7	shLUC	354952			d4	shLUC	noDOX	155644
shLUC	WT	75	3.347		d2	shLUC	118318			d6	shLUC	noDOX	219808
shLUC	WT	90	3.725		d3	shLUC	150323			d8	shLUC	noDOX	297775
shLUC	WT	164	7.291		d4	shLUC	187369			d2	shLUC	noDOX	97068
shLUC	WT	107	5.063		d5	shLUC	233800			d4	shLUC	noDOX	158875
shEGR1	WT	13	0.23		d6	shLUC	280683			d6	shLUC	noDOX	238025
shEGR1	WT	30	0.938		d7	shLUC	340333			d8	shLUC	noDOX	333299
shEGR1	WT	11	0.313		d8	shLUC	380052			d2	shLUC	DOX	105502
shEGR1	WT	12	0.216		d9	shLUC	425498			d4	shLUC	DOX	168711
shEGR1	WT	24	0.526		d2	shLUC	117338			d6	shLUC	DOX	267384
shEGR1	WT	6	0.127		d3	shLUC	150926			d8	shLUC	DOX	397892
					d4	shLUC	185629			d2	shLUC	DOX	95652
Fig. 3C					d5	shLUC	224646			d4	shLUC	DOX	161473
Treatment	Gene	Value			d6	shLUC	265270			d6	shLUC	DOX	263730
shLUC	TFEB	1			d7	shLUC	318249			d8	shLUC	DOX	394452
shLUC	TFEB	1.1487			d8	shLUC	356083			d2	shLUC	DOX	101697
shLUC	TFEB	1.13288			d9	shLUC	404602			d4	shLUC	DOX	167946
shLUC	TFEB	0.93088			d2	shLUC	115319			d6	shLUC	DOX	255662
shEGR1	TFEB	0.526072			d3	shLUC	148107			d8	shLUC	DOX	368098
shEGR1	TFEB	0.497695			d4	shLUC	185246			d2	shLUC	DOX	98935
shEGR1	TFEB	0.537126			d5	shLUC	223607			d4	shLUC	DOX	160470
shEGR1	TFEB	0.614152			d6	shLUC	264394			d6	shLUC	DOX	260575
shLUC	EGR1	1			d7	shLUC	320297			d8	shLUC	DOX	375586
shLUC	EGR1	1.16473			d8	shLUC	355526			d2	shLUC	DOX	111257
shLUC	EGR1	1.18372			d9	shLUC	401418			d4	shLUC	DOX	166722
shLUC	EGR1	0.936272			d2	shLUC	111224			d6	shLUC	DOX	260128
shEGR1	EGR1	0.50698			d3	shLUC	146598			d8	shLUC	DOX	349620
shEGR1	EGR1	0.471937			d4	shLUC	188251			d2	shEGR1	noDOX	98222
shEGR1	EGR1	0.491978			d5	shLUC	236532			d4	shEGR1	noDOX	127991
shEGR1	EGR1	0.450625			d6	shLUC	283571			d6	shEGR1	noDOX	151265
					d7	shLUC	344353			d8	shEGR1	noDOX	173200
					d8	shLUC	393162			d4	shEGR1	noDOX	122765
					d9	shLUC	444677			d6	shEGR1	noDOX	155975
					d2	shLUC	105933			d8	shEGR1	noDOX	200732
					d3	shLUC	134260			d2	shEGR1	noDOX	96255
					d4	shLUC	171324			d4	shEGR1	noDOX	125305
					d5	shLUC	212754			d6	shEGR1	noDOX	161380
					d6	shLUC	255890			d8	shEGR1	noDOX	214965
					d7	shLUC	318267			d2	shEGR1	noDOX	89776
					d8	shLUC	357585			d4	shEGR1	noDOX	131558
					d9	shLUC	401244			d6	shEGR1	noDOX	192665
					d2	shLUC	109536			d8	shEGR1	noDOX	277307
					d3	shLUC	144736			d2	shEGR1	noDOX	81167
					d4	shLUC	180066			d4	shEGR1	noDOX	115074
					d5	shLUC	218793			d6	shEGR1	noDOX	150239
					d6	shLUC	255750			d8	shEGR1	noDOX	196765
					d7	shLUC	301044			d2	shEGR1	DOX	95757
					d8	shLUC	336070			d4	shEGR1	DOX	147153
					d9	shLUC	374270			d6	shEGR1	DOX	240252
					d2	shLUC	93542			d8	shEGR1	DOX	349881
					d3	shLUC	133935			d2	shEGR1	DOX	98744
					d4	shLUC	165308			d4	shEGR1	DOX	151004
					d5	shLUC	199557			d6	shEGR1	DOX	237648
					d6	shLUC	238591			d8	shEGR1	DOX	315824
					d7	shLUC	288508			d2	shEGR1	DOX	92293
					d8	shLUC	330866			d4	shEGR1	DOX	136870
					d9	shLUC	377587			d6	shEGR1	DOX	229534
					d2	shEGR1	74723			d8	shEGR1	DOX	322100
					d3	shEGR1	83495			d2	shEGR1	DOX	92520
					d4	shEGR1	94230			d4	shEGR1	DOX	130090
					d5	shEGR1	107694			d6	shEGR1	DOX	221095
					d6	shEGR1	121970			d8	shEGR1	DOX	327633
					d7	shEGR1	140063			d2	shEGR1	DOX	96110
					d8	shEGR1	153678			d4	shEGR1	DOX	145564
					d9	shEGR1	173837			d6	shEGR1	DOX	216398
					d2	shEGR1	68342			d8	shEGR1	DOX	266450
					d3	shEGR1	76342
					d4	shEGR1	88087
					d5	shEGR1	100785
					d6	shEGR1	113738
					d7	shEGR1	130445
					d8	shEGR1	150673
					d9	shEGR1	170368
					d2	shEGR1	58457
					d3	shEGR1	67663
					d4	shEGR1	77465
					d5	shEGR1	90210
					d6	shEGR1	103668
					d7	shEGR1	119591
					d8	shEGR1	129012
					d9	shEGR1	145117
					d2	shEGR1	66155
					d3	shEGR1	72896
					d4	shEGR1	85291
					d5	shEGR1	100025
					d6	shEGR1	114603
					d7	shEGR1	135556
					d8	shEGR1	148318
					d9	shEGR1	168310
					d2	shEGR1	72386
					d3	shEGR1	78964
					d4	shEGR1	89438
					d5	shEGR1	99607
					d6	shEGR1	112996
					d7	shEGR1	127777
					d8	shEGR1	147181
					d9	shEGR1	162620
					d2	shEGR1	65836
					d3	shEGR1	73958
					d4	shEGR1	83121
					d5	shEGR1	93731
					d6	shEGR1	104126
					d7	shEGR1	118379
					d8	shEGR1	131843
					d9	shEGR1	153393
					d2	shEGR1	69868
					d3	shEGR1	76353
					d4	shEGR1	85517
					d5	shEGR1	94520
					d6	shEGR1	108935
					d7	shEGR1	125242
					d8	shEGR1	154501
					d9	shEGR1	170357

## Sheet: Fig. 4
Fig. 4B					Fig.4D					Fig. 4K
Condition	Treatment	Fluc/Rluc			Treatment	Gene	Value			Treatment	Condition	Intensity/Area
WT	DMSO	5.698			DMSO	TFEB	1			DMSO	CTRL	0.0138
MUT	DMSO	1.42568			DMSO	TFEB	0.939523			DMSO	CTRL	0.01496
WT	DMSO	3.15985			DMSO	TFEB	1			DMSO	CTRL	0.01774
MUT	DMSO	1.1952			DMSO	TFEB	0.97942			DMSO	CTRL	0.01567
WT	DMSO	3.44046			DMSO	TFEB	0.799221			DMSO	CTRL	0.01915
MUT	DMSO	0.981494			TRAMETINIB	TFEB	0.721965			DMSO	CTRL	0.01994
WT	DMSO	4.67697			TRAMETINIB	TFEB	0.659754			DMSO	CTRL	0.01537
MUT	DMSO	1.09655			TRAMETINIB	TFEB	0.76313			DMSO	CTRL	0.01506
WT	DMSO	3.61419			TRAMETINIB	TFEB	0.48971			DMSO	CTRL	0.02564
MUT	DMSO	1.24398			TRAMETINIB	TFEB	0.718636			DMSO	CTRL	0.01728
WT	TRAMETINIB	2.13838			DMSO	EGR1	1			DMSO	CTRL	0.0109
MUT	TRAMETINIB	0.654454			DMSO	EGR1	0.686184			DMSO	CTRL	0.01441
WT	TRAMETINIB	1.72886			DMSO	EGR1	1			DMSO	TFEB	0.00966
MUT	TRAMETINIB	1.02257			DMSO	EGR1	0.952638			DMSO	TFEB	0.04555
WT	TRAMETINIB	2.8929			DMSO	EGR1	0.808508			DMSO	TFEB	0.00753
MUT	TRAMETINIB	0.733382			TRAMETINIB	EGR1	0.102711			DMSO	TFEB	0.006323
WT	TRAMETINIB	2.52549			TRAMETINIB	EGR1	0.122428			DMSO	TFEB	0.009049
MUT	TRAMETINIB	0.909412			TRAMETINIB	EGR1	0.272312			DMSO	TFEB	0.007274
WT	TRAMETINIB	2.05			TRAMETINIB	EGR1	0.215636			DMSO	TFEB	0.01078
MUT	TRAMETINIB	0.533569			TRAMETINIB	EGR1	0.304955			DMSO	TFEB	0.005961
										DMSO	TFEB	0.006528
Fig. 4C					Fig. 4G					DMSO	TFEB	0.03742
Concentration	Condition	Value			Treatment	Number of colonies	Area (%)			DMSO	TFEB	0.008648
90	WT	709			DMSO	573	17.514			DMSO	TFEB	0.01145
30	WT	1534			DMSO	572	18.588			TRAMETINIB	CTRL	0.3348
10	WT	3834			DMSO	583	20.13			TRAMETINIB	CTRL	0.2451
3.333	WT	3791			DMSO	524	13.255			TRAMETINIB	CTRL	0.2226
1.111	WT	3465			DMSO	619	19.871			TRAMETINIB	CTRL	0.1934
0.37	WT	4180			DMSO	503	17.668			TRAMETINIB	CTRL	0.2206
0.123	WT	4205			TRAMETINIB	1	0.215			TRAMETINIB	CTRL	0.1852
0.041	WT	3164			TRAMETINIB	1	0.544			TRAMETINIB	CTRL	0.1371
0.014	WT	3903			TRAMETINIB	3	0.268			TRAMETINIB	CTRL	0.2391
0.005	WT	5466			TRAMETINIB	4	0.666			TRAMETINIB	TFEB	0.04467
90	WT	398			TRAMETINIB	1	0.237			TRAMETINIB	TFEB	0.03729
30	WT	1083			TRAMETINIB	2	0.391			TRAMETINIB	TFEB	0.007066
10	WT	3221			DMSO	562.333	42.0365			TRAMETINIB	TFEB	0.01832
3.333	WT	3854			TRAMETINIB	2	1.26491			TRAMETINIB	TFEB	0.01625
1.111	WT	4013								TRAMETINIB	TFEB	0.02163
0.37	WT	3940			Fig. 4I					TRAMETINIB	TFEB	0.03028
0.123	WT	3438			Treatment	Number of colonies	Area (%)			TRAMETINIB	TFEB	0.01544
0.041	WT	4040			CTRL_TRAMETINIB	14	0.236			TRAMETINIB	TFEB	0.01714
0.014	WT	4098			CTRL_TRAMETINIB	15	0.249			TRAMETINIB	TFEB	0.01832
0.005	WT	4432			CTRL_TRAMETINIB	27	0.422			TRAMETINIB	TFEB	0.0195
90	WT	552			CTRL_TRAMETINIB	27	0.455
30	WT	1261			CTRL_TRAMETINIB	16	0.221
10	WT	3427			CTRL_TRAMETINIB	23	0.383
3.333	WT	4840			EGR1_TRAMETINIB	48	0.861
1.111	WT	3626			EGR1_TRAMETINIB	41	0.794
0.37	WT	4513			EGR1_TRAMETINIB	63	1.164
0.123	WT	3559			EGR1_TRAMETINIB	41	0.725
0.041	WT	4076			EGR1_TRAMETINIB	27	0.471
0.014	WT	3824			EGR1_TRAMETINIB	31	0.565
0.005	WT	4676			TFEB_TRAMETINIB	106	2.228
90	KO	220			TFEB_TRAMETINIB	156	3.654
30	KO	329			TFEB_TRAMETINIB	104	2.1
10	KO	1880			TFEB_TRAMETINIB	91	1.995
3.333	KO	1780			TFEB_TRAMETINIB	64	1.518
1.111	KO	1271			TFEB_TRAMETINIB	62	1.263
0.37	KO	2166
0.123	KO	2335
0.041	KO	1740
0.014	KO	1065
0.005	KO	1939
90	KO	252
30	KO	295
10	KO	1081
3.333	KO	1472
1.111	KO	1863
0.37	KO	1466
0.123	KO	851
0.041	KO	1613
0.014	KO	2123
0.005	KO	1814
90	KO	213
30	KO	235
10	KO	1118
3.333	KO	1366
1.111	KO	877
0.37	KO	825
0.123	KO	1154
0.041	KO	908
0.014	KO	935
0.005	KO	1211

## Sheet: Fig. S1
Fig. S1A left				Fig. S1A right
TPM	Tissue	Cell_type		Cell_line	CPM
89.9	Muscle Tissue	Skeletal muscle		hESC	56.7513
57.2	Lymphoid Tissues	Spleen		hESC	38.613
41.5	Digestive Tract	Tongue		hESC	57.5827
39.9	Brain	White matter		hESC	46.6674
37.1	Muscle Tissue	Heart muscle		hESC	54.6418
34.6	Digestive Tract	Small intestine		hESC	62.3967
31.3	Endocrine Tissue	Pituitary gland		hESC	8.54206
30.9	Brain	Medulla oblongata		HSMM	7.58766
29.9	Brain	Basal ganglia		HSMM	7.39513
27.7	Brain	Midbrain		HUVEC	13.7241
26.7	Urinary Tract	Kidney		HUVEC	11.189
26.1	Lymphoid Tissues	Lymph node		HUVEC	14.9013
25.8	Brain	Pons		HUVEC	14.6286
25.7	Digestive Tract	Colon		K562	17.9769
25.4	Brain	Thalamus		K562	28.2209
24	Brain	Cerebellum		K562	24.0447
23.5	Brain	Cerebral cortex		K562	31.3514
23.4	Male Tissues	Prostate		NHEK	13.0901
22.9	Endocrine Tissue	Thyroid gland		NHEK	12.4367
22.5	Brain	Spinal cord		NHEK	4.63855
21.2	Digestive Tract	Salivary gland		NHLF	4.39348
19.7	Brain	Hypothalamus		NHLF	5.61655
19.6	Urinary Tract	Urinary bladder
18.3	Brain	Amygdala
18.2	Lung	Lung
18.1	Brain	Hippocampal formation
17.9	Skin	Skin
17.8	Endocrine Tissue	Parathyroid gland
17.2	Lymphoid Tissues	Tonsil
16.7	Lymphoid Tissues	Appendix
15.6	Female Tissues	Vagina
15	Female Tissues	Breast
14.8	Digestive Tract	Esophagus
14.5	Female Tissues	Placenta
14.4	Digestive Tract	Stomach
14.3	Adipose Tissue	Adipose tissue
13.4	Female Tissues	Cervix
12.9	Pancreas	Pancreas
12.8	Female Tissues	Fallopian tube
11.6	Liver and Gallbladder	Liver
11.1	Female Tissues	Endometrium
10.7	Endocrine Tissue	Adrenal gland
9.6	Brain	Choroid plexus
8.3	Lymphoid Tissues	Bone Marrow
7.7	Liver and Gallbladder	Gallbladder
7	Male Tissues	Seminal vescicle
6.5	Female Tissues	Ovary
5.8	Digestive Tract	Duodenum
5.7	Muscle Tissue	Smooth muscle
5	Lymphoid Tissues	Thymus
4.3	Digestive Tract	Rectum
2.6	Male Tissues	Testis
2.2	Brain	Retina
1.5	Male Tissues	Epididymis

## Sheet: Fig. S2
Fig. S2A						Fig. S2B
Pathway	P.value	Overlap	P.adj	Database		Gene Symbol	CTRL	CTRL	CTRL	CTRL	EGR1	EGR1	EGR1	EGR1
TNF-alpha Signaling via NF-kB	6.74729e-24	48	3.37365e-22	KEGG		RRAGD	0	0	0	0	6.95383	4.19291	12.9622	6.89178
mTORC1 Signaling	5.79161e-14	39.5	1.4479e-12	KEGG		GABARAPL2	76.6433	128.219	79.2317	78.0183	132.728	116.703	144.797	146.259
Protein Secretion	1.66601e-13	50	2.77667e-12	KEGG		HEXB	89.197	130.648	73.3808	90.2087	144.216	149.547	126.777	132.475
Epithelial Mesenchymal Transition	1.76812e-12	38	2.21016e-11	KEGG		WIPI1	5.61611	5.12876	4.63201	7.04332	6.95383	9.43405	13.5945	9.18904
Endocytosis	3.83789e-13	36.1111	1.21661e-10	KEGG		RAB7A	148.992	147.924	164.314	152.786	234.012	241.442	249.127	235.852
Autophagy	1.17e-12	43.0657	1.85445e-10	KEGG		PPP1R15A	20.4823	20.2451	9.7516	15.4411	62.8868	68.8336	85.9931	78.4897
Apoptosis	1.00208e-10	38.5093	1.00208e-09	KEGG		XBP1	46.2503	61.815	36.8123	43.8853	77.7015	95.0393	71.4501	63.1746
Hypoxia	3.45289e-10	35.5	2.8774e-09	KEGG		GLA	38.3217	40.4902	42.4194	41.1763	74.0734	57.3031	65.7594	62.4089
IL-2/STAT5 Signaling	7.25186e-10	35.1759	5.1799e-09	KEGG		CLN5	11.8929	18.0856	14.8712	16.2538	36.2809	25.8563	36.0412	28.3329
Unfolded Protein Response	3.17294e-09	40.708	1.98309e-08	KEGG		RHEB	67.0629	75.5817	81.4258	71.7877	102.493	121.594	109.072	77.724
Pathways in cancer	4.17649e-10	27.8719	4.41316e-08	KEGG		ARSB	5.28575	5.39869	9.99539	5.95973	22.9779	16.7716	18.9691	17.6123
Auto	0.00165159	35.443	0.00330319	Custom_genesets		RRAGC	75.3219	95.5568	75.5749	81.8109	110.657	111.112	119.505	129.029
Lyso	0.00926931	33.75	0.00926931	Custom_genesets		SLC2A1	145.358	161.961	132.378	134.094	246.71	247.032	263.038	258.059
						CTSD	145.028	139.286	144.567	130.843	182.311	175.753	191.588	174.592
						SGK1	72.0183	63.7046	72.6494	66.9116	142.1	134.173	115.395	132.475
						NPC2	119.59	139.826	113.606	113.235	609.216	621.948	532.082	568.189
						ATG101	62.7683	68.8333	60.2161	65.0153	149.356	151.993	186.845	143.579
						SLC36A1	13.8751	12.9569	11.9457	11.1068	23.5826	32.8445	26.5567	31.013
						VAMP7	24.1162	24.564	25.5979	18.1501	47.7698	41.2303	42.0481	41.3507
						BHLHE40	22.7948	20.2451	20.7221	21.6718	68.9337	52.4114	52.7972	58.963
						NPC1	21.143	20.515	21.9411	17.3374	41.723	47.1702	45.8419	24.5041
						FLCN	15.5269	12.417	12.1895	19.7755	23.5826	25.5069	28.4536	23.3555
						SQSTM1	529.896	545.538	513.909	524.998	1388.05	1439.57	1405.61	1421.24
						TSC1	37.661	38.3307	35.5933	37.3838	36.8856	53.4596	61.6495	64.3233
						BORCS5	2.97323	6.2085	2.4379	2.43807	8.46554	5.59055	6.00687	8.04041
						SLC3A2	455.896	597.635	426.632	482.197	867.113	919.994	1011.68	931.539
						ATG13	36.3395	51.5575	37.5437	34.9457	74.0734	58.7007	61.9656	70.0664
						LITAF	405.681	429.196	429.07	448.064	605.286	567.79	557.69	537.942
						UVRAG	15.5269	24.564	18.2842	26.5479	31.7458	31.4468	34.1443	36.7562
						HEXA	60.1254	73.1523	65.5795	58.7846	108.54	110.413	120.137	101.462

## Sheet: Fig. S3
Fig. S3B
Pathway	P.value	Overlap	P.adj	Database
TNF-alpha Signaling via NF-kB	1.62334e-25	16	7.46735e-24	KEGG
Hypoxia	1.11486e-19	13.5	2.56419e-18	KEGG
Apoptosis	1.52833e-06	7.45342	2.34344e-05	KEGG
IL-2/STAT5 Signaling	2.46454e-06	6.53266	2.83422e-05	KEGG
FoxO signaling pathway	1.30146e-06	8.39695	0.000235565	KEGG
Mitophagy	3.07093e-05	10.2941	0.00277919	KEGG
G2-M Checkpoint	0.000328915	5	0.00302601	KEGG
Longevity regulating pathway	6.07e-05	7.84314	0.00366224	KEGG
AMPK signaling pathway	0.000189886	6.66667	0.00645026	KEGG
Cellular senescence	0.000227777	5.76923	0.00645026	KEGG
Transcriptional misregulation in cancer	0.000237284	5.20833	0.00645026	KEGG

## Sheet: Fig. S4
Fig. S4B
Time point	Condition	Value
T0	CTRL	228
T0	CTRL	216
T0	CTRL	225
T0	CTRL	230
T0	CTRL	206
T0	CTRL	204
T0	CTRL	205
T0	CTRL	210
T0	CTRL	202
T0	CTRL	235
T0	CTRL	230
T0	CTRL	200
T0	TFEB low	220
T0	TFEB low	210
T0	TFEB low	215
T0	TFEB low	201
T0	TFEB low	202
T0	TFEB low	211
T0	TFEB low	201
T0	TFEB low	205
T0	TFEB low	207
T0	TFEB low	200
T0	TFEB low	210
T0	TFEB low	205
T0	TFEB high	201
T0	TFEB high	205
T0	TFEB high	210
T0	TFEB high	200
T0	TFEB high	200
T0	TFEB high	210
T0	TFEB high	205
T0	TFEB high	201
T0	TFEB high	220
T0	TFEB high	210
T0	TFEB high	215
T0	TFEB high	201
T24	CTRL	140
T24	CTRL	180
T24	CTRL	170
T24	CTRL	180
T24	CTRL	180
T24	CTRL	134
T24	CTRL	108
T24	CTRL	80
T24	CTRL	180
T24	CTRL	188
T24	CTRL	134
T24	CTRL	158
T24	TFEB low	100
T24	TFEB low	106
T24	TFEB low	86
T24	TFEB low	130
T24	TFEB low	60
T24	TFEB low	60
T24	TFEB low	40
T24	TFEB low	100
T24	TFEB low	110
T24	TFEB low	140
T24	TFEB low	130
T24	TFEB low	140
T24	TFEB high	60
T24	TFEB high	53
T24	TFEB high	70
T24	TFEB high	40
T24	TFEB high	20
T24	TFEB high	30
T24	TFEB high	40
T24	TFEB high	30
T24	TFEB high	37
T24	TFEB high	20
T24	TFEB high	40
T24	TFEB high	24

## Sheet: Fig. S5
Fig. S5A						Fig. S5D
Gene	Condition	Treatment	Value			Pathway	P.value	Overlap	P.adj	Database
TFEB	FED	DMSO	1			Myc Targets V1	8.19098e-57	61.5	4.09549e-55	KEGG
TFEB	FED	DMSO	0.95705			Ribosome	6.09704e-46	62.0253	1.88398e-43	KEGG
TFEB	FED	DMSO	0.948246			G2-M Checkpoint	2.72784e-26	44	6.81961e-25	KEGG
TFEB	FED	TRAMETINIB	0.816014			Myc Targets V2	1.80125e-24	72.4138	3.00208e-23	KEGG
TFEB	FED	TRAMETINIB	0.832199			E2F Targets	1.70842e-23	42	2.13553e-22	KEGG
TFEB	FED	TRAMETINIB	0.97041			Coronavirus disease	1.90416e-23	39.6552	2.94192e-21	KEGG
TFEB	HBSS	DMSO	1.98848			Spliceosome	5.17788e-23	46.6667	5.33322e-21	KEGG
TFEB	HBSS	DMSO	1.72508			RNA transport	5.84182e-18	38.7097	4.51281e-16	KEGG
TFEB	HBSS	DMSO	1.99538			Ribosome biogenesis in eukaryotes	1.98589e-12	40.7407	1.22728e-10	KEGG
TFEB	HBSS	TRAMETINIB	1.08172			Mitotic Spindle	1.36261e-08	28.6432	1.36261e-07	KEGG
TFEB	HBSS	TRAMETINIB	1.11471
TFEB	HBSS	TRAMETINIB	1.32256
EGR1	FED	DMSO	1
EGR1	FED	DMSO	1.02811
EGR1	FED	DMSO	0.97942
EGR1	FED	TRAMETINIB	0.109829
EGR1	FED	TRAMETINIB	0.133817
EGR1	FED	TRAMETINIB	0.13061
EGR1	HBSS	DMSO	2.79271
EGR1	HBSS	DMSO	2.65737
EGR1	HBSS	DMSO	2.67586
EGR1	HBSS	TRAMETINIB	0.602904
EGR1	HBSS	TRAMETINIB	0.51883
EGR1	HBSS	TRAMETINIB	0.735433
